# Supplementary material for: Moxifloxacin hydrochloride loaded proliposomal gel: Formulation, characterization and therapeutic evaluation of periodontitis
Source: Research Square preprint supplement (doi:10.21203/rs.3.rs-6753048/v1), 2025-07-22
Supplement: Supplementary file 1 [file 351b524e45204000f2b7cecb.docx]

**Moxifloxacin hydrochloride loaded proliposomal gel: Formulation, characterization and therapeutic evaluation of periodontitis**

**Supplementary Information**

**Table 4** ANOVA data for Particle size response

**Response 1:** Particle size

| **Source** | **Sum of Squares** | **df** | **Mean Square** | **F-value** | **p-value** |  |
| --- | --- | --- | --- | --- | --- | --- |
| **Model** | 49133.33 | 5 | 9826.67 | 80.40 | 0.0022 | significant |
| A-Cholesterol | 12604.17 | 1 | 12604.17 | 103.12 | 0.0020 |  |
| B-Soya lecithin | 30104.17 | 1 | 30104.17 | 246.31 | 0.0006 |  |
| AB | 2500.00 | 1 | 2500.00 | 20.45 | 0.0202 |  |
| A² | 312.50 | 1 | 312.50 | 2.56 | 0.2081 |  |
| B² | 3612.50 | 1 | 3612.50 | 29.56 | 0.0122 |  |
| **Residual** | 366.67 | 3 | 122.22 |  |  |  |
| **Cor Total** | 49500.00 | 8 |  |  |  |  |

**Table 5** Fit Statistics for particle size

| **Std. Dev.** | 11.06 | **R²** | 0.9926 |
| --- | --- | --- | --- |
| **Mean** | 236.67 | **Adjusted R²** | 0.9802 |
| **C.V. %** | 4.67 | **Predicted R²** | 0.9121 |
|  |  | **Adeq Precision** | 25.8492 |

**Table 6** Coefficients in terms of coded factors

| **Factor** | **Coefficient Estimate** | **df** | **Standard Error** | **95% CI Low** | **95% CI High** | **VIF** |
| --- | --- | --- | --- | --- | --- | --- |
| Intercept | 256.67 | 1 | 8.24 | 230.44 | 282.89 |  |
| A-Cholesterol | 45.83 | 1 | 4.51 | 31.47 | 60.20 | 1.0000 |
| B-Soya lecithin | 70.83 | 1 | 4.51 | 56.47 | 85.20 | 1.0000 |
| AB | 25.00 | 1 | 5.53 | 7.41 | 42.59 | 1.0000 |
| A² | 12.50 | 1 | 7.82 | -12.38 | 37.38 | 1.0000 |
| B² | -42.50 | 1 | 7.82 | -67.38 | -17.62 | 1.0000 |

**Table 7** ANOVA for Quadratic model

**Response 2: %Entrapment Efficiency**

| **Source** | **Sum of Squares** | **df** | **Mean Square** | **F-value** | **p-value** |  |
| --- | --- | --- | --- | --- | --- | --- |
| **Model** | 401.33 | 5 | 80.27 | 12.38 | 0.0323 | significant |
| A-Cholesterol | 12.61 | 1 | 12.61 | 1.95 | 0.2574 |  |
| B-Soya lecithin | 68.68 | 1 | 68.68 | 10.59 | 0.0473 |  |
| AB | 56.25 | 1 | 56.25 | 8.68 | 0.0602 |  |
| A² | 16.63 | 1 | 16.63 | 2.56 | 0.2076 |  |
| B² | 247.16 | 1 | 247.16 | 38.13 | 0.0086 |  |
| **Residual** | 19.45 | 3 | 6.48 |  |  |  |
| **Cor Total** | 420.78 | 8 |  |  |  |  |

**Table 8** Fit Statistics

| **Std. Dev.** | 2.55 | **R²** | 0.9538 |
| --- | --- | --- | --- |
| **Mean** | 81.16 | **Adjusted R²** | 0.8768 |
| **C.V. %** | 3.14 | **Predicted R²** | 0.4597 |
|  |  | **Adeq Precision** | 9.0594 |

**Table 9.** Coefficients in Terms of Coded Factors

| **Factor** | **Coefficient Estimate** | **df** | **Standard Error** | **95% CI Low** | **95% CI High** | **VIF** |
| --- | --- | --- | --- | --- | --- | --- |
| Intercept | 86.64 | 1 | 1.90 | 80.60 | 92.68 |  |
| A-Cholesterol | -1.45 | 1 | 1.04 | -4.76 | 1.86 | 1.0000 |
| B-Soya lecithin | 3.38 | 1 | 1.04 | 0.0754 | 6.69 | 1.0000 |
| AB | -3.75 | 1 | 1.27 | -7.80 | 0.3014 | 1.0000 |
| A² | 2.88 | 1 | 1.80 | -2.85 | 8.61 | 1.0000 |
| B² | -11.12 | 1 | 1.80 | -16.85 | -5.39 | 1.0000 |
